# Supplementary material for: Climate controls on erosion in tectonically active landscapes
Source: PubMed Central journal article supplement (PMC7567587; doi:10.1126/sciadv.aaz3166), 2020-10-16
Supplement: aaz3166_SM.pdf [file aaz3166_SM.pdf]

[advances.sciencemag.org/cgi/content/full/6/42/eaaz3166/DC1](https://advances.sciencemag.org/cgi/content/full/6/42/eaaz3166/DC1)

## Supplementary Materials for

### **Climate controls on erosion in tectonically active landscapes**

B. A. Adams\*, K. X. Whipple, A. M. Forte, A. M. Heimsath, K. V. Hodges

\*Corresponding author. Email: [byron.adams@bristol.ac.uk](mailto:byron.adams@bristol.ac.uk)

Published 16 October 2020, *Sci. Adv.* **6**, eaaz3166 (2020)  
DOI: [10.1126/sciadv.aaz3166](https://doi.org/10.1126/sciadv.aaz3166)

**This PDF file includes:**

Figs. S1 to S7  
Tables S1 and S2

# Supplementary Materials

## Supplementary Figures and Tables

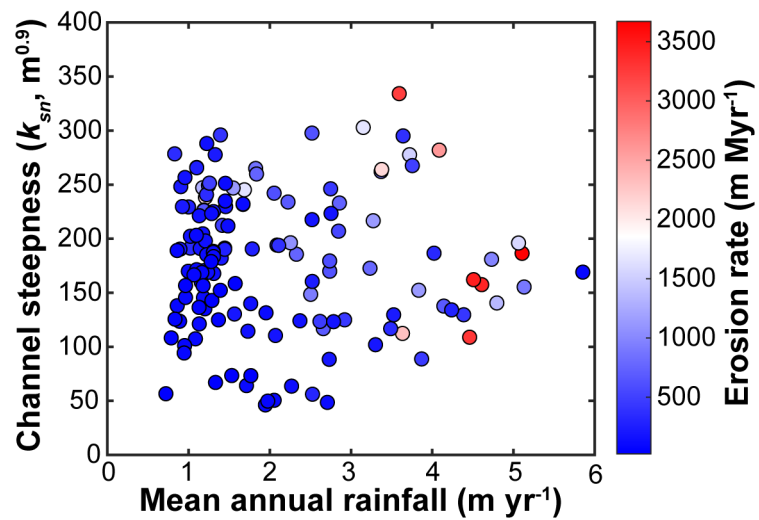

**Fig. S1. Comparisons of mean annual rainfall, erosion rate, and channel steepness from the study area.** Note that there is no single relationship that defines the dataset. However, a rough pattern emerges when considering the basin-averaged erosion rates.

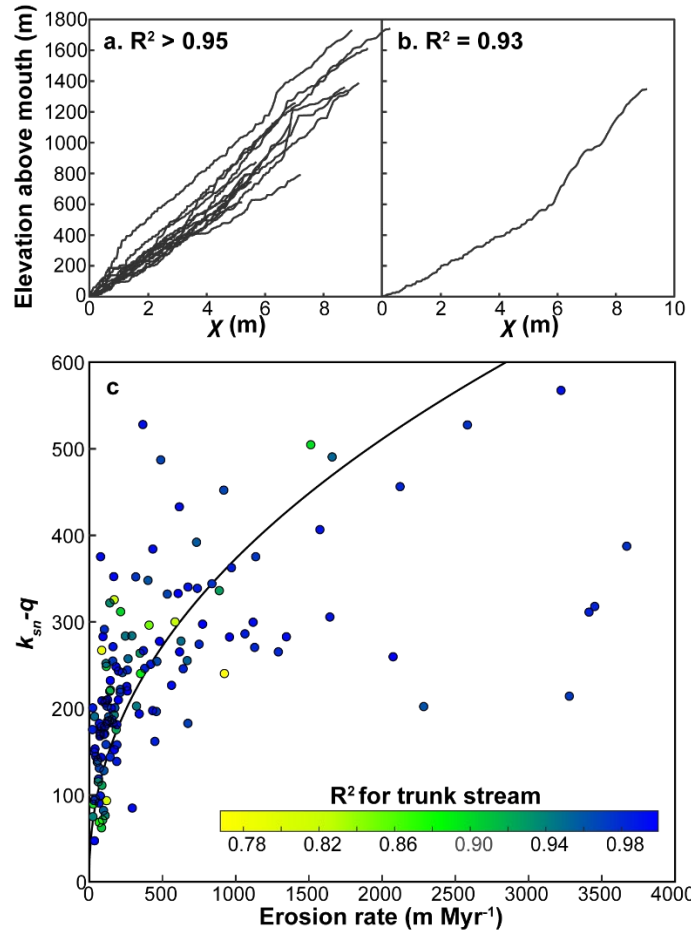

**Fig. S2. Assessing quasi-equilibrium landscapes.** a)  $\chi$  plots of new sampled basins from Bhutan that exhibit an  $R^2$  value greater than 0.95. b)  $\chi$  plot of the new sampled basin from Bhutan that exhibits an  $R^2$  value less than 0.95. c) Plot of all  $k_{sn} - q$  values and erosion rates for all sample data colored by  $R^2$  value of the  $\chi$  plot. The black curve represents our solution for the stream-power model where  $n$  is 2.2,  $m$  is 1, and  $K_{lp}$  is  $2.2 \cdot 10^{-9} \text{ m}^{-2}$ . This solution does not change if we recalculate these values after having removed all basins with  $R^2$  values lower than 0.95.

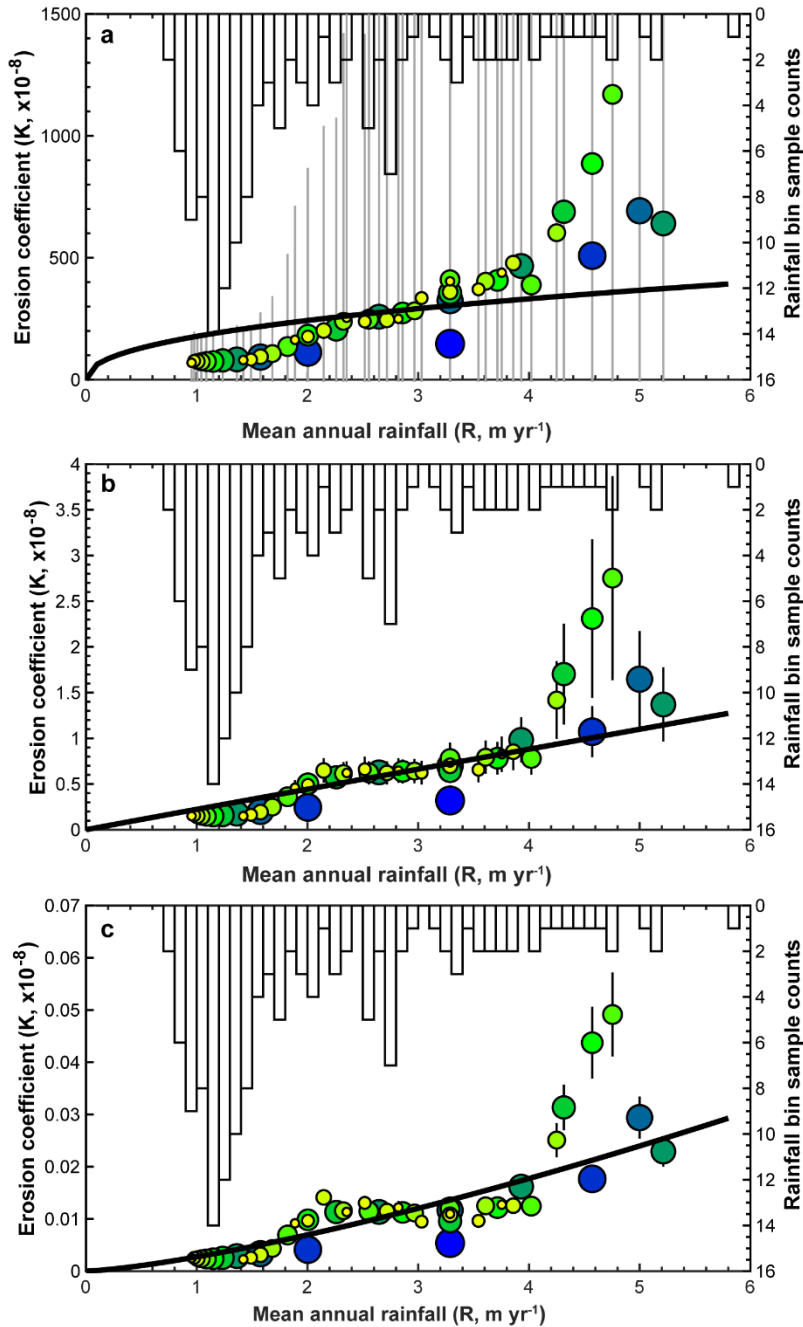

**Fig. S3. The effects of varying  $n$  to find best-fit parameters.** Colored points show the resulting  $K$  values from regressions of binned sample data where  $n = 1$  (a),  $n = 2.2$  (b), and  $n = 3$  (c). The black line is derived from the stream-power model (equation 1c). An inverted histogram (calculated with  $0.1 \text{ m yr}^{-1}$  bins) shows the distribution of mean annual rainfall ( $R$ ) sample data analyzed in this study. See text and Fig. 3 for more details. The units of  $K$  are dependent on  $m$  (equation 1c), which changes with  $n$ . The units of  $K$  in a), b), and c) are  $\text{m}^{0.1} \text{ yr}^{-1}$ ,  $\text{m}^{-1} \text{ yr}^{-1}$ , and  $\text{m}^{-1.7} \text{ yr}^{-1}$ , respectively. Note that the  $K$  values also fluctuate by orders of magnitude when  $n$  changes, and in the very unlikely case that  $n = 1$  the uncertainties on the regression  $K$  values are very large.

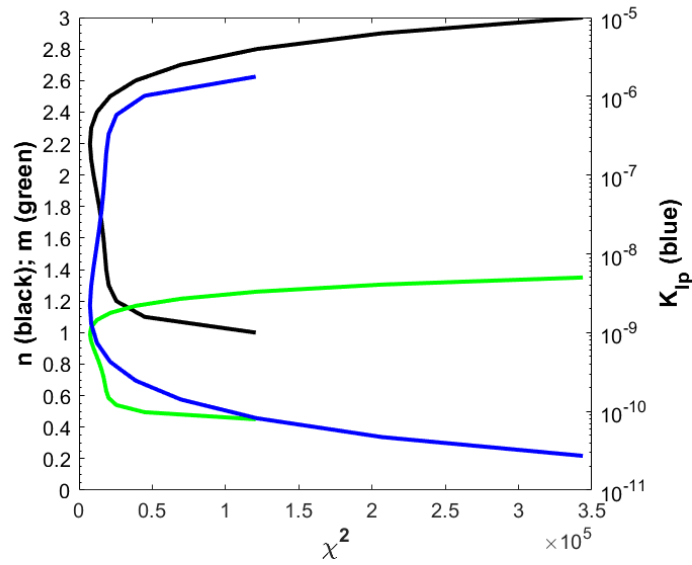

**Fig. S4.**  $\chi^2$  values calculated from different combinations of the slope exponent,  $n$ , and the partial coefficient of erosion,  $K_{lp}$ , and the area exponent,  $m$ .  $\chi^2$  is at a minimum where the  $K_{lp}$ - $n$ - $m$  triplet yields the smallest cumulative mismatch between predicted and observed  $k_{sn}$  values. Best-fit values are  $n = 2.2$ ,  $m = 1$ , and  $K_{lp} = 2.2 \cdot 10^{-9} \text{ m}^{-2}$ .

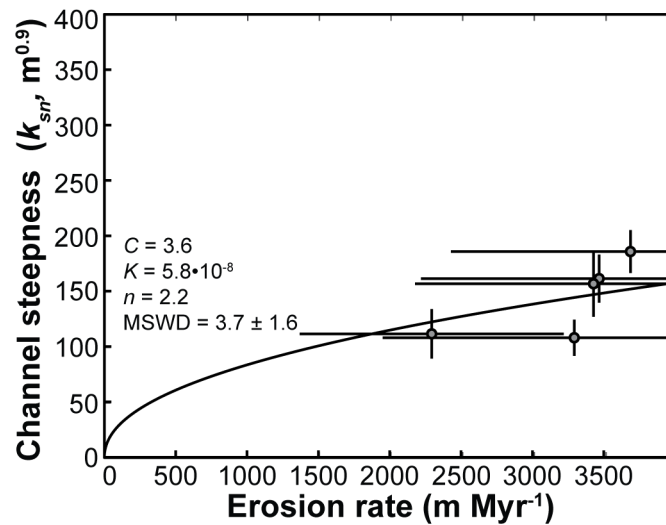

**Fig. S5.** Testing variable  $K_{lp}$  values in Bhutan. The stream-power law curve to fit the outlier low-relief, high erosion rate landscapes in southwestern Bhutan. Taken at face value, this regression suggests a  $K_{lp}$  value of  $1.2 \cdot 10^{-8}$ , which is  $\sim 6$  times more erodible than the regional best-fit  $K_{lp}$ .

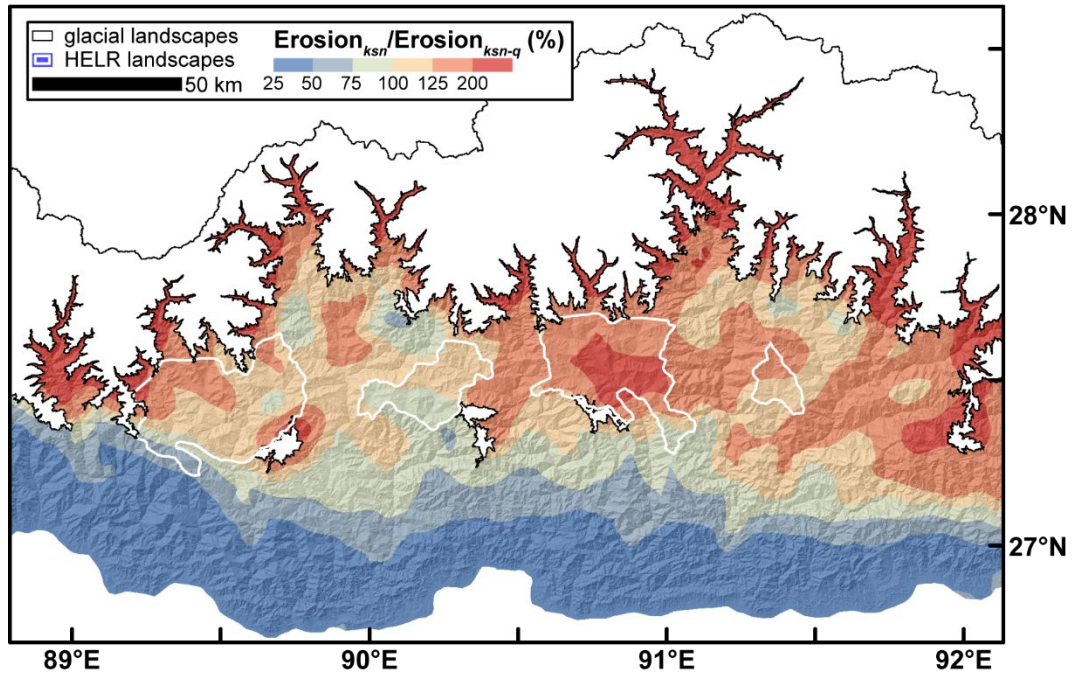

**Fig. S6.** Comparison of the erosion rates calculated from area-based channel steepness maps ( $Erosion_{ksn}$ ) and the erosion rates calculated from the discharge-based channel steepness ( $Erosion_{ksn-q}$ ). Note that in the wetter front ranges erosion rates based on area-based channel steepness leads to upwards of a 4-fold under prediction, and in the drier hinterland upwards of a 3-fold over prediction.

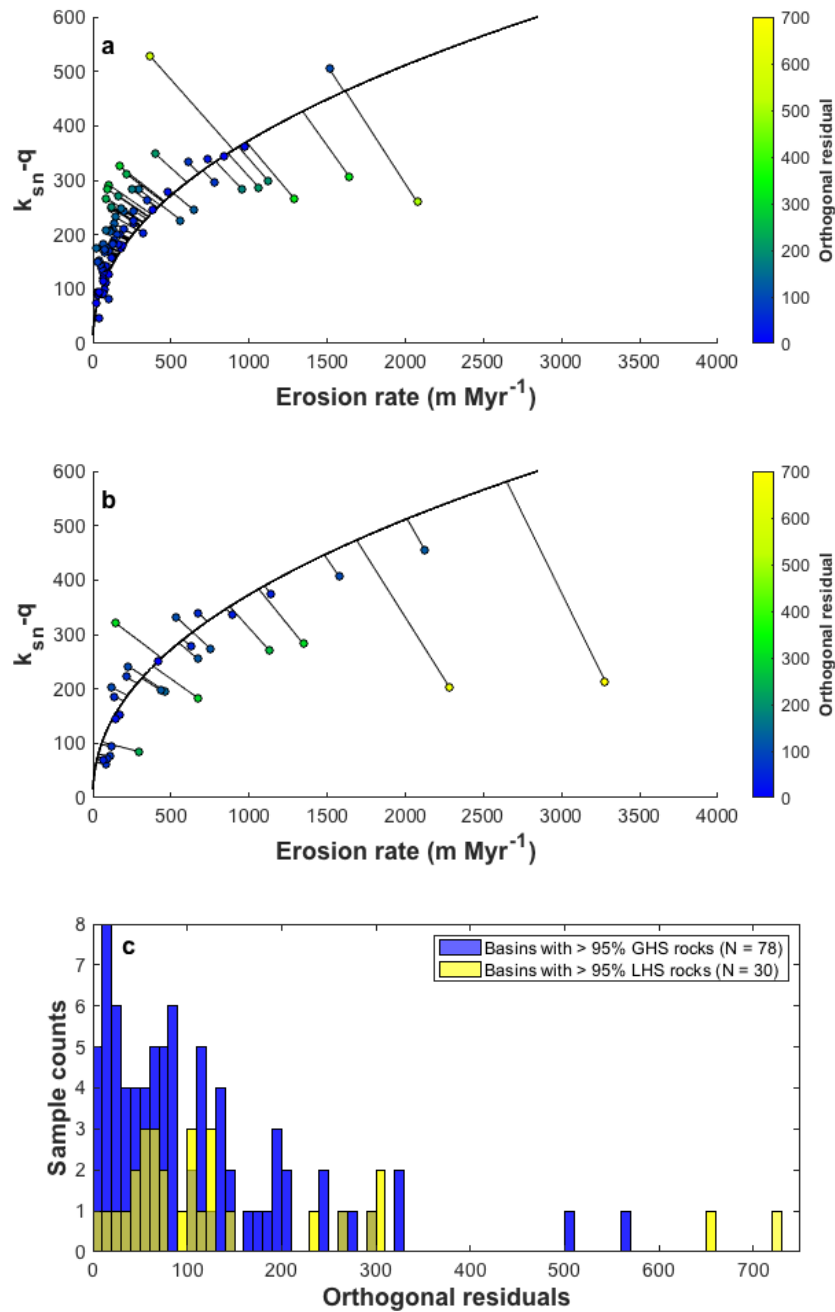

**Fig. S7. Analysis of tectono-stratigraphic units of the Himalaya.** a) Orthogonal residuals of observations from basin-averaged samples collected within the Greater Himalayan lithologies (upper amphibolite to granulite ortho- and para-gneisses) referenced to our best-fit stream-power model. b) Orthogonal residuals of observations from basin-averaged samples collected within the Lesser Himalayan lithologies (predominantly green-schist metasedimentary rocks). c) Distribution of orthogonal residuals for both units demonstrating that samples from the two units do not represent different populations. Therefore, there is no evidence for different  $K_{lp}$  values in these rock packages, consistent with findings of prior studies (see text for details). N is the number of samples represented in each unit.

Table S1. Laboratory and isotopic data for new Bhutan samples and blanks.

| Sample Name       | Latitude (°N) | Longitude (°E) | Elevation (m a.s.l.) | Quartz (g) | Be from spike (g) | $^{10}\text{Be}/^9\text{Be}$ from AMS | $^{10}\text{Be}/^9\text{Be}$ 1 $\sigma$ | Blank $^{10}\text{Be}$ (atoms) | Blank $^{10}\text{Be}$ 1 $\sigma$ (atoms) | $^{10}\text{Be}$ Blank $^{10}\text{Be}$ Used | [ $^{10}\text{Be}$ ] (atoms/g) | [ $^{10}\text{Be}$ ] 1 $\sigma$ (atoms/g) |
|-------------------|---------------|----------------|----------------------|------------|-------------------|---------------------------------------|-----------------------------------------|--------------------------------|-------------------------------------------|----------------------------------------------|--------------------------------|-------------------------------------------|
| BT09103           | 26.876629     | 90.266828      | 294                  | 103.6220   | 1.80E-04          | 1.90E-13                              | 2.78E-14                                | --                             | --                                        | LB01                                         | 22009                          | 3252                                      |
| BT1106            | 26.868584     | 89.397420      | 265                  | 97.3346    | 1.90E-04          | 1.63E-14                              | 2.69E-15                                | --                             | --                                        | LB <sub>AVG</sub>                            | 1941                           | 355                                       |
| BT1107            | 26.859617     | 89.465067      | 349                  | 100.6914   | 1.89E-04          | 1.47E-14                              | 1.96E-15                                | --                             | --                                        | LB <sub>AVG</sub>                            | 1665                           | 251                                       |
| BT1108            | 26.837079     | 89.469833      | 332                  | 94.5717    | 1.90E-04          | 4.85E-14                              | 4.59E-15                                | --                             | --                                        | LB <sub>AVG</sub>                            | 6306                           | 620                                       |
| BT1114            | 27.033085     | 90.078891      | 348                  | 103.8554   | 1.90E-04          | 7.39E-14                              | 5.52E-15                                | --                             | --                                        | LB <sub>AVG</sub>                            | 8866                           | 683                                       |
| BT1116            | 26.845815     | 90.183628      | 335                  | 102.5252   | 1.89E-04          | 1.37E-14                              | 2.23E-15                                | --                             | --                                        | LB <sub>AVG</sub>                            | 1511                           | 279                                       |
| BT1118            | 26.938299     | 90.372321      | 502                  | 100.5142   | 1.89E-04          | 1.54E-14                              | 2.23E-15                                | --                             | --                                        | LB <sub>AVG</sub>                            | 1745                           | 284                                       |
| BT1119            | 26.941358     | 90.382716      | 489                  | 105.7515   | 1.87E-04          | 1.62E-14                              | 2.32E-15                                | --                             | --                                        | LB <sub>AVG</sub>                            | 1734                           | 278                                       |
| BT1125            | 27.076351     | 90.761209      | 628                  | 100.9733   | 1.89E-04          | 2.02E-13                              | 9.32E-15                                | --                             | --                                        | LB <sub>AVG</sub>                            | 25060                          | 1192                                      |
| BT1127            | 26.965505     | 90.855892      | 249                  | 106.9903   | 1.89E-04          | 3.02E-14                              | 2.89E-15                                | --                             | --                                        | LB <sub>AVG</sub>                            | 3394                           | 346                                       |
| BT1128            | 26.943598     | 90.872009      | 222                  | 100.5115   | 1.84E-04          | 4.05E-14                              | 2.95E-15                                | --                             | --                                        | LB <sub>AVG</sub>                            | 4764                           | 367                                       |
| BT1129            | 26.932064     | 90.867574      | 215                  | 104.0817   | 1.88E-04          | 3.08E-14                              | 3.66E-15                                | --                             | --                                        | LB <sub>AVG</sub>                            | 3553                           | 446                                       |
| BT1131            | 26.858651     | 90.943339      | 295                  | 93.4598    | 1.88E-04          | 8.67E-14                              | 5.99E-15                                | --                             | --                                        | LB <sub>AVG</sub>                            | 11475                          | 816                                       |
| BT1133            | 26.913679     | 90.910364      | 211                  | 99.7272    | 1.88E-04          | 6.53E-14                              | 5.42E-15                                | --                             | --                                        | LB <sub>AVG</sub>                            | 8031                           | 688                                       |
| LB01              | --            | --             | --                   | --         | 1.94E-04          | 1.90E-13                              | 2.78E-14                                | 188023                         | 43721                                     | --                                           | --                             | --                                        |
| LB04              | --            | --             | --                   | --         | 1.84E-04          | 2.11E-15                              | 8.61E-16                                | --                             | --                                        | --                                           | --                             | --                                        |
| LB05              | --            | --             | --                   | --         | 1.90E-04          | 5.61E-16                              | 5.37E-16                                | --                             | --                                        | --                                           | --                             | --                                        |
| LB06              | --            | --             | --                   | --         | 1.88E-04          | 1.12E-15                              | 5.60E-16                                | --                             | --                                        | --                                           | --                             | --                                        |
| LB07              | --            | --             | --                   | --         | 1.90E-04          | 2.11E-15                              | 8.61E-16                                | --                             | --                                        | --                                           | --                             | --                                        |
| LB <sub>AVG</sub> | --            | --             | --                   | --         | --                | --                                    | --                                      | 18454                          | 4520                                      | --                                           | --                             | --                                        |



**Table S2. Least-squares estimation (LSE) and stream-power model (SPM) statistics.** Fixed denotes that the exponent  $n$  was fixed to a value of 2.2. Note that a  $K$  values cannot be computed for the SPM using  $k_{sn-q}$  data as the SPM only relies on  $K_{ip}$  (see equation 4c).

| Dataset                                  | C LSE (fixed) | $\phi$ LSE (fixed) | $K$ LSE (fixed) | $n$ LSE (fixed) | LSE (fixed) | $\phi$ LSE (free) | $K$ LSE (free) | $n$ LSE (free) | MSWD LSE (free) | LSE (free) | $1\sigma$ (free) | MSWD LSE (free) | $K$ SPM (fixed) | MSWD SPM (fixed) | $1\sigma$ (fixed) | MSWD SPM (fixed) |
|------------------------------------------|---------------|--------------------|-----------------|-----------------|-------------|-------------------|----------------|----------------|-----------------|------------|------------------|-----------------|-----------------|------------------|-------------------|------------------|
| $k_{sn}$ all data                        | 14            | 0.45               | 3.2E-09         | 2.2             | 24.41       | 68                | 0.16           | 5.6E-18        | 6.1             | 21.35      | 0.12             | 3.4E-09         | 3.4E-09         | 24.85            | 0.12              | 0.12             |
| $k_{sn}$ $R = 0.75$ m yr <sup>-1</sup>   | 19            | 0.45               | 1.5E-09         | 2.2             | 13.13       | 50                | 0.26           | 3.4E-13        | 3.8             | 12.83      | 0.17             | 1.7E-09         | 1.7E-09         | 13.32            | 0.17              | 0.17             |
| $k_{sn}$ $R = 2$ m yr <sup>-1</sup>      | 12            | 0.45               | 4.5E-09         | 2.2             | 17.34       | 15                | 0.40           | 1.1E-09        | 2.5             | 18.60      | 0.28             | 4.4E-09         | 4.4E-09         | 17.47            | 0.28              | 0.28             |
| $k_{sn}$ $R = 3$ m yr <sup>-1</sup>      | 9.8           | 0.45               | 6.5E-09         | 2.2             | 23.82       | 9.0               | 0.47           | 9.1E-09        | 2.1             | 24.11      | 0.30             | 6.6E-09         | 6.6E-09         | 23.82            | 0.30              | 0.30             |
| $k_{sn}$ $R = 4.75$ m yr <sup>-1</sup>   | 7.6           | 0.45               | 1.2E-08         | 2.2             | 17.09       | 119               | 0.05           | 2.5E-46        | 19              | 25.62      | 0.32             | 1.0E-08         | 1.0E-08         | 16.91            | 0.32              | 0.32             |
| $k_{sn-q}$ all data                      | 18            | 0.45               | 1.8E-09         | 2.2             | 16.78       | 43                | 0.29           | 2.6E-12        | 3.4             | 15.68      | 0.12             | --              | --              | 17.78            | 0.12              | 0.12             |
| $k_{sn-q}$ $R = 0.75$ m yr <sup>-1</sup> | 21            | 0.45               | 1.3E-09         | 2.2             | 13.58       | 46                | 0.29           | 2.0E-12        | 3.4             | 12.81      | 0.17             | --              | --              | 18.83            | 0.17              | 0.17             |
| $k_{sn-q}$ $R = 2$ m yr <sup>-1</sup>    | 16            | 0.45               | 2.4E-09         | 2.2             | 16.56       | 20                | 0.41           | 7.0E-10        | 2.4             | 17.41      | 0.28             | --              | --              | 17.13            | 0.28              | 0.28             |
| $k_{sn-q}$ $R = 3$ m yr <sup>-1</sup>    | 16            | 0.45               | 2.3E-09         | 2.2             | 21.32       | 12                | 0.50           | 6.7E-09        | 2.0             | 21.92      | 0.30             | --              | --              | 21.29            | 0.30              | 0.30             |
| $k_{sn-q}$ $R = 4.75$ m yr <sup>-1</sup> | 15            | 0.45               | 2.8E-09         | 2.2             | 16.52       | 231               | 0.05           | 4.4E-54        | 20              | 26.27      | 0.32             | --              | --              | 16.53            | 0.32              | 0.32             |
